# Supplementary material for: New Insight into the Reactivity of S,S-Bis-ylide
Source: MDPI journal article supplement (doi:10.3390/molecules28083295), 2023-04-07
Supplement: s1 [file s1]

## Supporting information for

### New Insight into the Reactivity of S,S-Bis-ylide

Ugo Authesserre <sup>1†</sup>, V. S. V. S. N. Swamy <sup>1†</sup>, Nathalie Saffon-Merceron <sup>2</sup>, Antoine Baceiredo <sup>1</sup>, Tsuyoshi Kato <sup>1,\*</sup>, and Eddy Maerten <sup>1,\*</sup>

<sup>1</sup> Université de Toulouse, UPS, and CNRS, LHFA UMR 5069, 118 Route de Narbonne, 31062 Toulouse, France

<sup>2</sup> Université de Toulouse, UPS, and CNRS, ICT UAR2599 118 Route de Narbonne, 31062 Toulouse, France

\* Correspondence: tsuyoshi.kato@univ-tlse3.fr (T.K.); eddy.maerten@univ-tlse3.fr (E.M.)

† These authors contributed equally to this work

|                                    | <b>Page</b> |
|------------------------------------|-------------|
| <b>Table of contents</b>           | <b>S2</b>   |
| <b>Selected spectroscopic data</b> | <b>S3</b>   |
| <b>X-ray analysis</b>              | <b>S8</b>   |

## Selected spectroscopic data

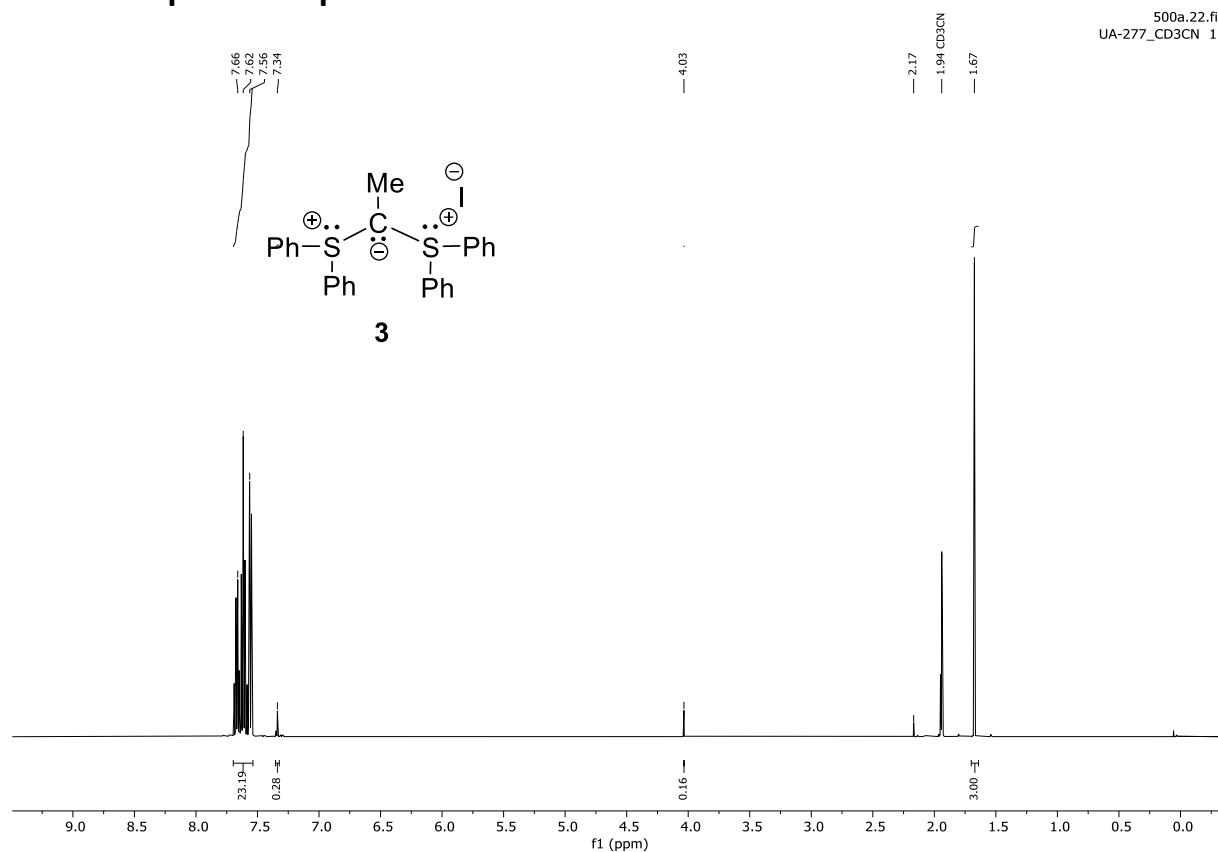

Figure S1. <sup>1</sup>H NMR (500 MHz, CD<sub>3</sub>CN)

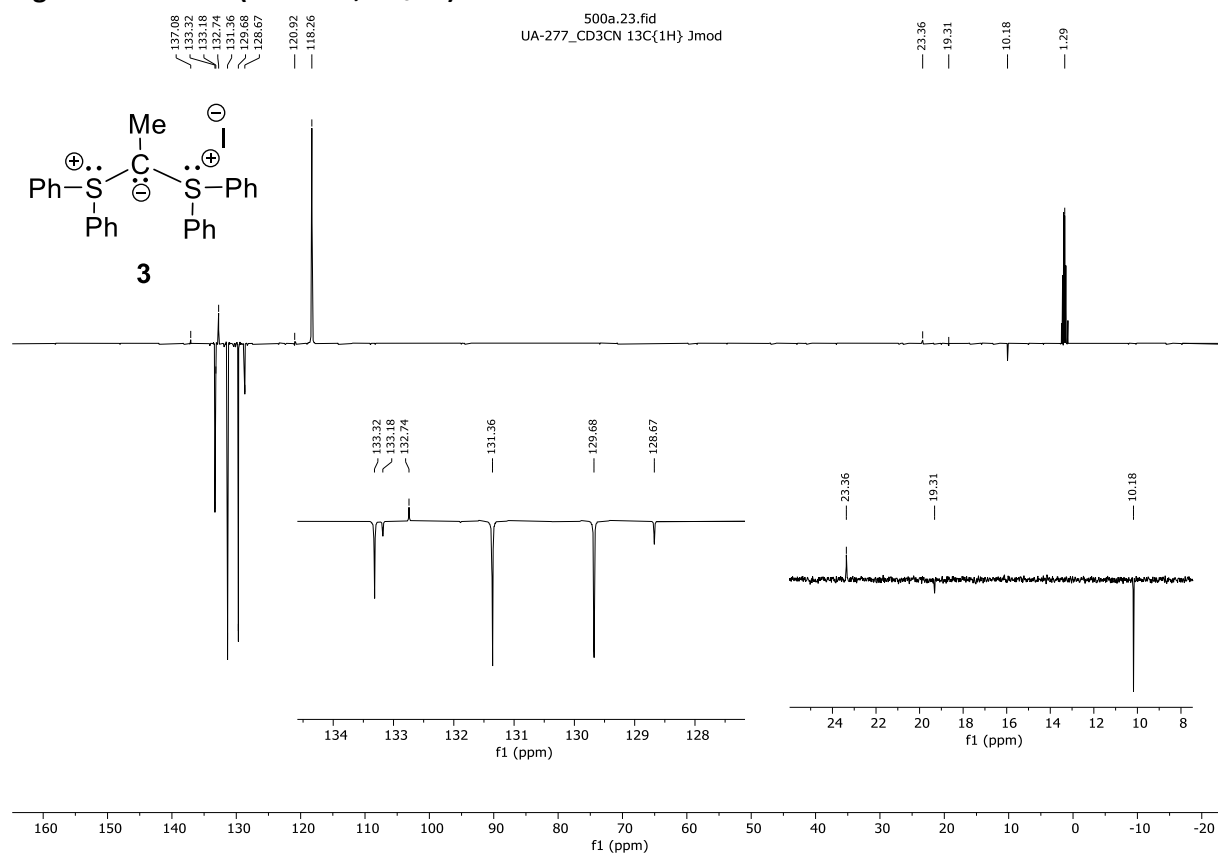

Figure S2. J-mod <sup>13</sup>C{<sup>1</sup>H} NMR (125 MHz, CD<sub>3</sub>CN)

varre\_s\_400b.242.fid  
VS-220 THF-D8 1H T=0C

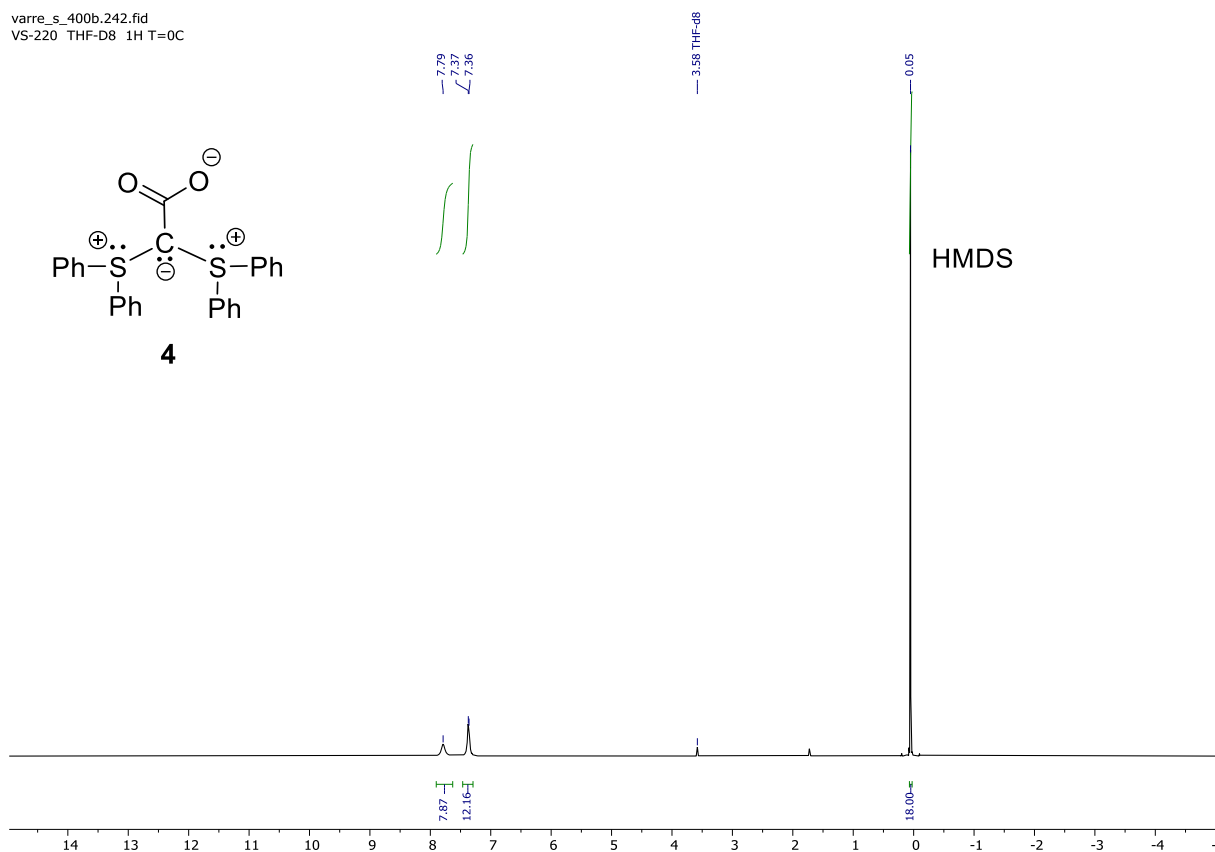

Figure S3. <sup>1</sup>H NMR (400 MHz, THF-d<sub>8</sub>, 273 K)

varre\_s\_400b.243.fid  
VS-220 THF-D8 13C{1H} zgpg30 T=0C

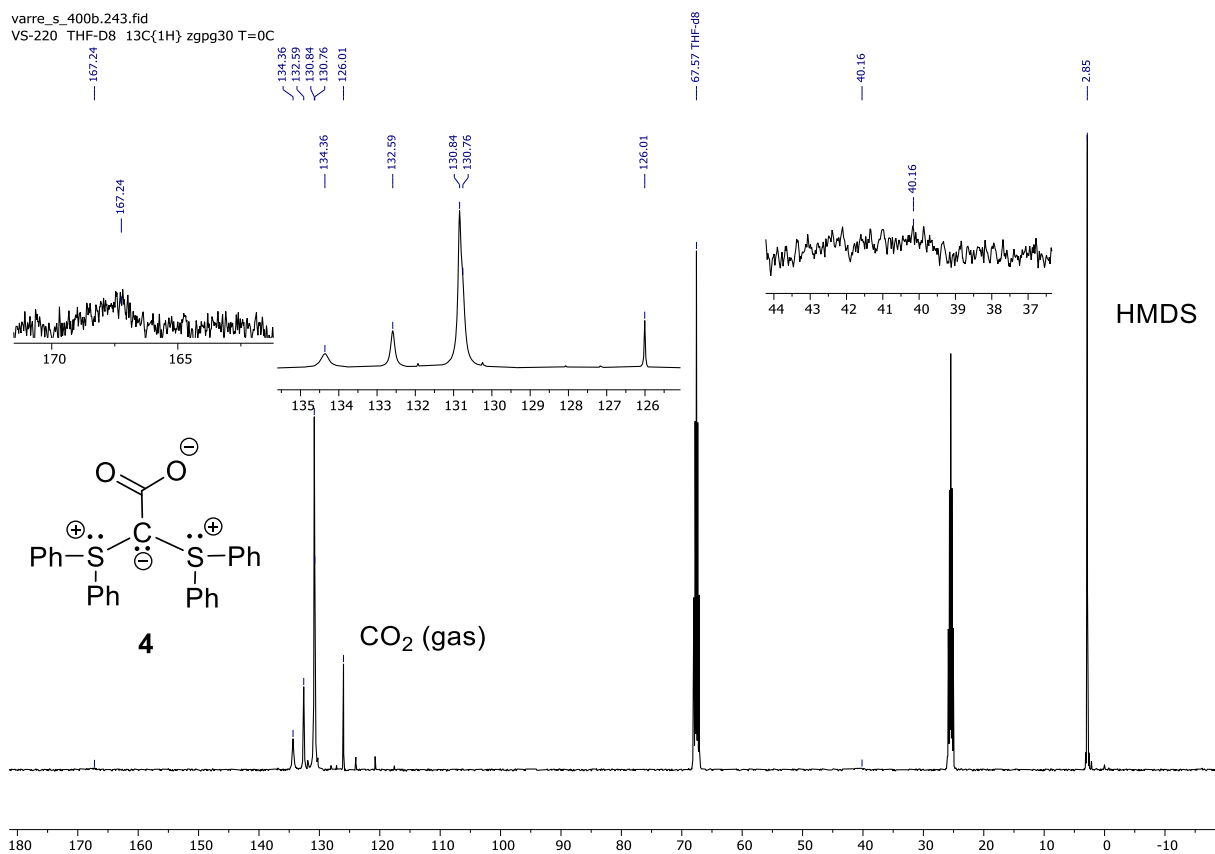

Figure S4. <sup>13</sup>C{<sup>1</sup>H} NMR (100 MHz, THF-d<sub>8</sub>, 273 K)

varre\_s\_300a.251.fid  
hfa ECOIH  
VS-217\_Final Compd

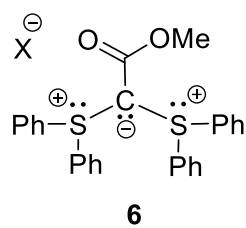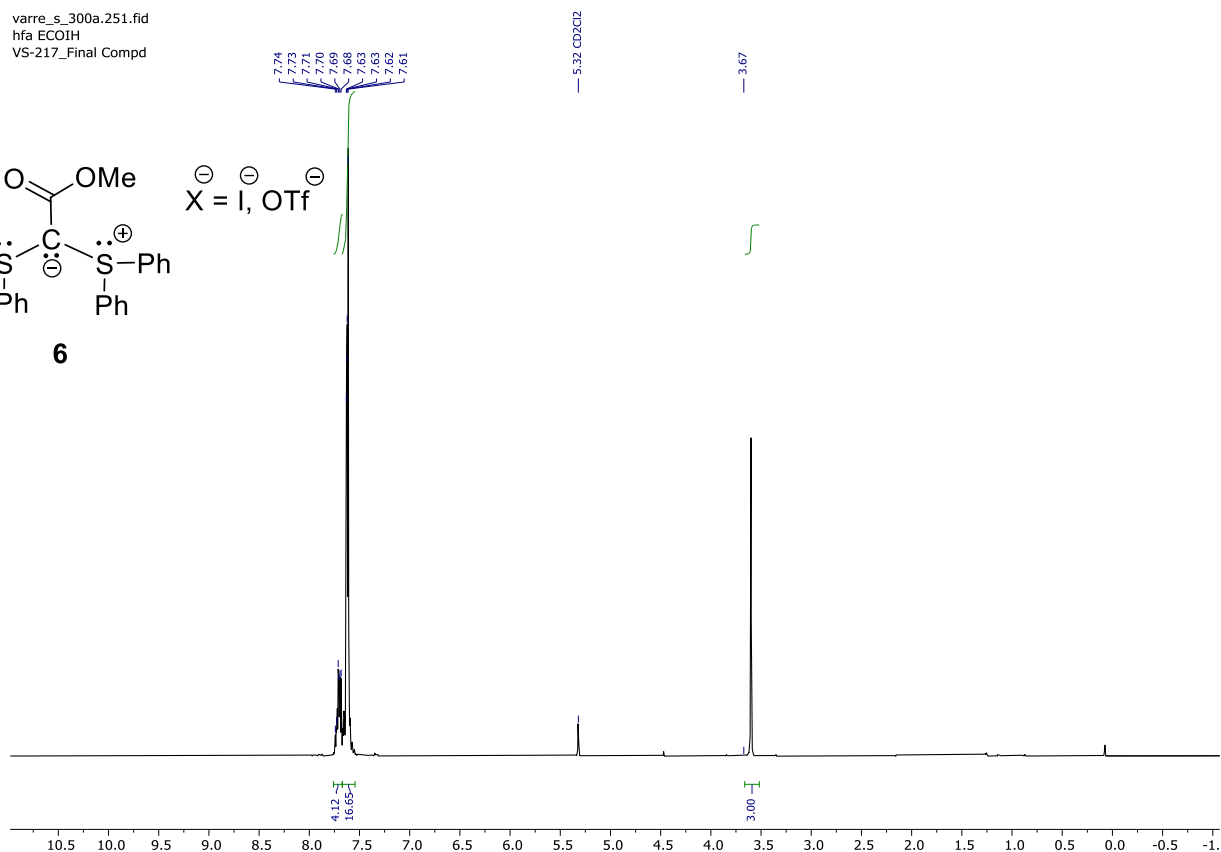

**Figure S5.  $^1\text{H}$  NMR (300 MHz,  $\text{CD}_2\text{Cl}_2$ )**

varre\_s\_300a.253.fid  
hfa ECOIH  
VS-217\_Final Compd

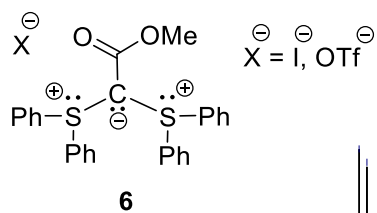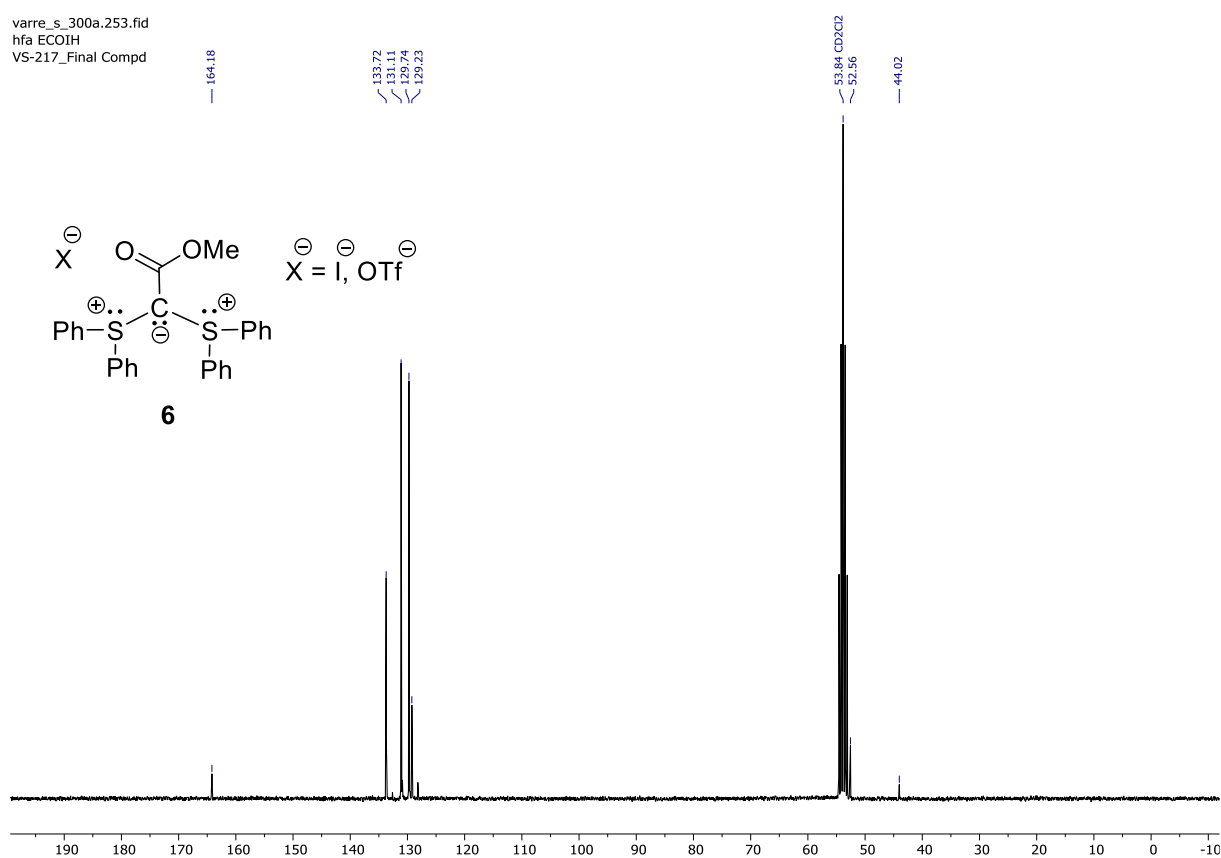

**Figure S6.  $^{13}\text{C}\{^1\text{H}\}$  NMR (75 MHz,  $\text{CD}_2\text{Cl}_2$ )**

varre\_s\_300a.349.fid  
hfa ECOIH  
VS-228 in C6D6-1

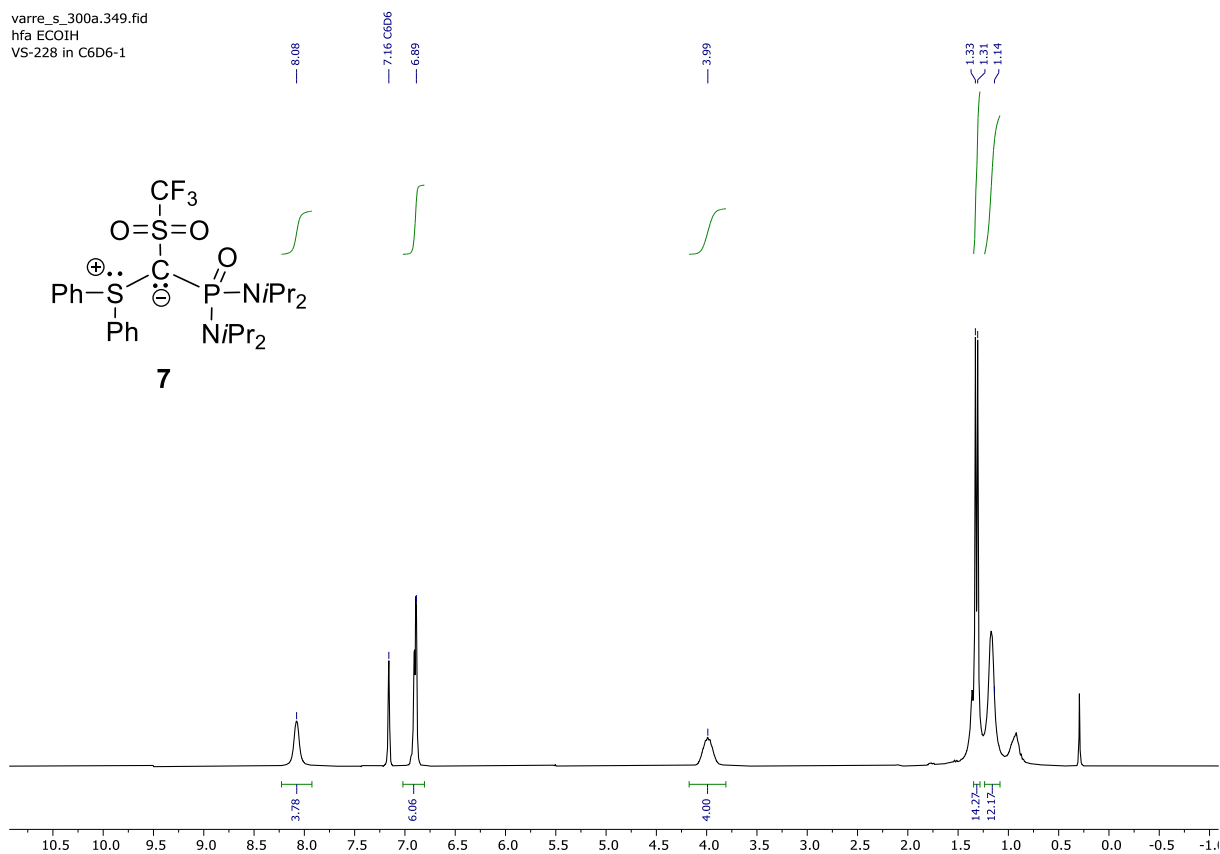

Figure S7. <sup>1</sup>H NMR (300 MHz, C<sub>6</sub>D<sub>6</sub>)

varre\_s\_300a.351.fid  
hfa ECOIH  
VS-228 in C6D6-1

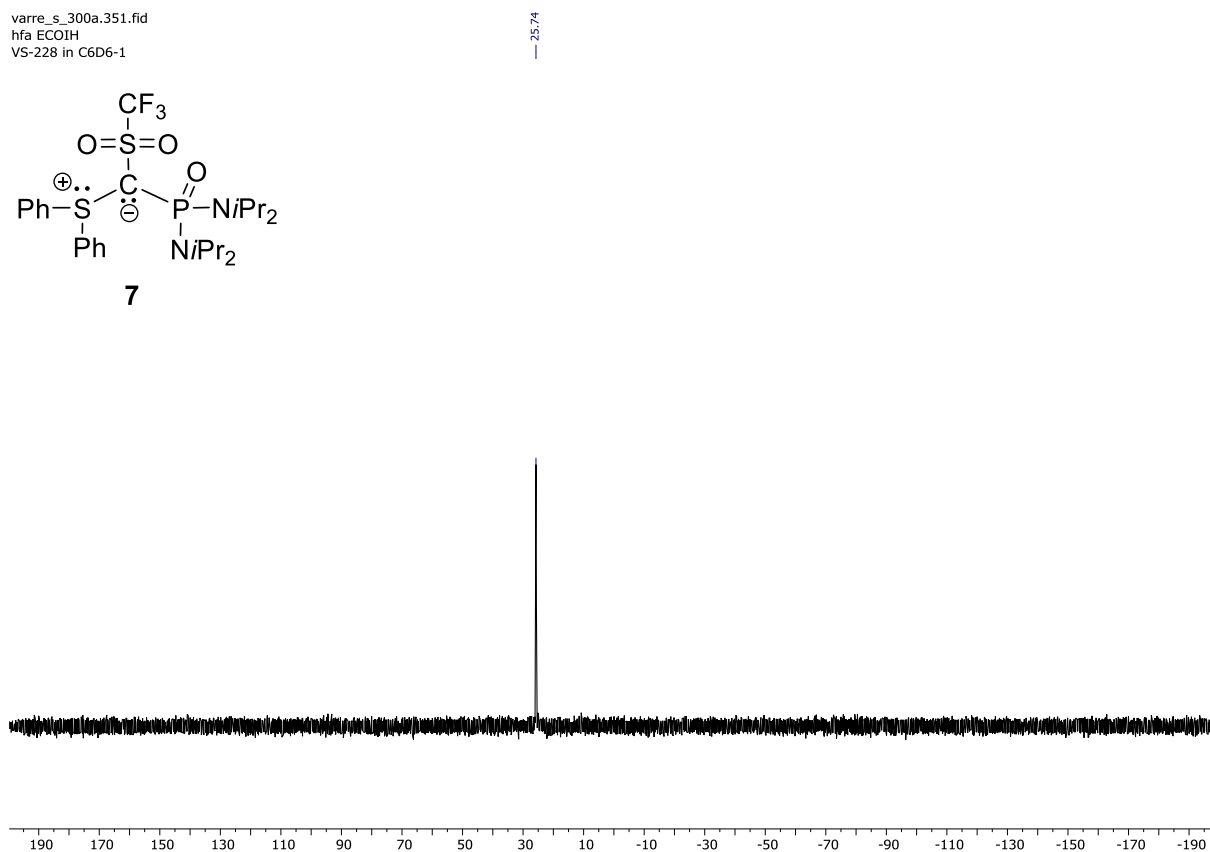

Figure S8. <sup>31</sup>P{<sup>1</sup>H} NMR (121 MHz, C<sub>6</sub>D<sub>6</sub>)

varre\_s\_300a.350.fid  
hfa ECOIH  
VS-228 in C6D6-1

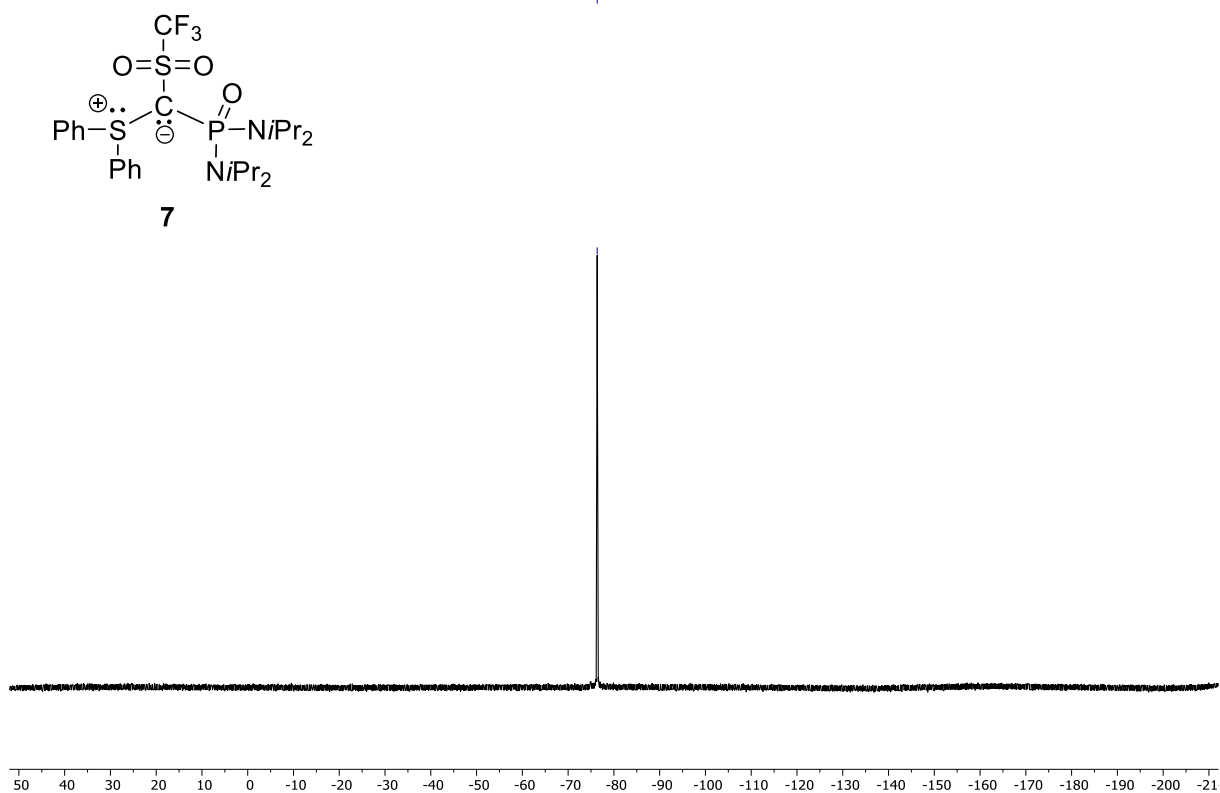

Figure S9.  $^{19}\text{F}\{^1\text{H}\}$  NMR (282 MHz,  $\text{C}_6\text{D}_6$ )

## X-ray analysis

The data of the structures **3**, **5**, **6-I**, **6-OTf** and **7** were collected at 193 K on a Bruker-AXS APEX II CCD Quazar diffractometer (**7**) equipped with a 30 W air-cooled microfocus source and on a Bruker-AXS D8-Venture diffractometer (**3**, **5**, **6-I** and **6-OTf**) equipped with a Photon III-C14 detector with MoK $\alpha$  radiation (wavelength = 0.71073 Å) by using phi- and omega-scans. The data were integrated with SAINT, and an empirical absorption correction with SADABS was applied [S1]. The structures were solved using an intrinsic phasing method (ShelXT) [S2] and refined using the least-squares method on  $F^2$  (ShelXL-2014) [S3]. All non-H atoms were treated anisotropically. All H atoms attached to C atoms were fixed geometrically and treated as riding on their parent atoms with C-H = 0.95 Å (aromatic), 0.98 Å (CH<sub>3</sub>), 0.99 Å (CH<sub>2</sub>) or 1.0 Å (CH) with  $U_{\text{iso}}(\text{H}) = 1.2U_{\text{eq}}(\text{CH}, \text{CH}_2)$  or  $U_{\text{iso}}(\text{H}) = 1.5U_{\text{eq}}(\text{CH}_3)$ . The structures **3** and **6-I** were found to be disordered. Several restraints (SAME, SADI, SIMU, DELU) were applied to refine these disorders and to avoid the collapse of the structure during the least-squares refinement by the large anisotropic displacement parameters.

Supplementary crystallographic data for CCDC-2250100 (**3**), CCDC-2250101 (**5**), CCDC-2250102 (**6-I**), CCDC-2250103 (**6-OTf**) and CCDC-2250104 (**7**) can be obtained free of charge from The Cambridge Crystallographic Data Centre via <https://www.ccdc.cam.ac.uk/structures/>.

The details of data collection and crystal structures refinement are summarized in Table S1 and S2.



**Table S1.** Crystallographic data for the compounds **3**, **5** and **6-I**

| Compound                                                  | <b>3</b>                                        | <b>5</b>                                                                        | <b>6-I</b>                                                     |
|-----------------------------------------------------------|-------------------------------------------------|---------------------------------------------------------------------------------|----------------------------------------------------------------|
| Chemical formula                                          | C <sub>26</sub> H <sub>23</sub> IS <sub>2</sub> | C <sub>30</sub> H <sub>29</sub> F <sub>3</sub> O <sub>5</sub> S <sub>3</sub> Si | C <sub>27</sub> H <sub>23</sub> IO <sub>2</sub> S <sub>2</sub> |
| <i>M<sub>r</sub></i>                                      | 526.46                                          | 650.80                                                                          | 570.47                                                         |
| Crystal system                                            | Monoclinic                                      | Monoclinic                                                                      | Monoclinic                                                     |
| Space group                                               | C2/c                                            | <i>P</i> 2 <sub>1</sub> /c                                                      | C2/c                                                           |
| <i>a</i> [Å]                                              | 19.4524(6)                                      | 10.5839(5)                                                                      | 21.7134(17)                                                    |
| <i>b</i> [Å]                                              | 10.1958(4)                                      | 14.1490(7)                                                                      | 15.8295(13)                                                    |
| <i>c</i> [Å]                                              | 14.0908(5)                                      | 20.5519(8)                                                                      | 17.2334(13)                                                    |
| $\alpha$ [°]                                              | 90                                              | 90                                                                              | 90                                                             |
| $\beta$ [°]                                               | 123.8931(10)                                    | 92.8708(18)                                                                     | 123.179(2)                                                     |
| $\gamma$ [°]                                              | 90                                              | 90                                                                              | 90                                                             |
| <i>V</i> [Å <sup>3</sup> ]                                | 2319.80(14)                                     | 3073.8(2)                                                                       | 4957.6(7)                                                      |
| <i>Z</i>                                                  | 4                                               | 4                                                                               | 8                                                              |
| $\rho$ [g cm <sup>-3</sup> ]                              | 1.507                                           | 1.406                                                                           | 1.529                                                          |
| $\mu$ (MoK $\alpha$ ) [mm <sup>-1</sup> ]                 | 1.570                                           | 0.337                                                                           | 1.482                                                          |
| Reflections collected                                     | 41092                                           | 169695                                                                          | 123535                                                         |
| Independent reflections                                   | 2859<br>R(int)=0.0339                           | 7647<br>R(int)=0.0567                                                           | 6152<br>R(int)=0.0719                                          |
| Data/<br>restraints/<br>parameters                        | 2859/293/210                                    | 7647/0/382                                                                      | 6152/226/345                                                   |
| Crystal size [mm <sup>3</sup> ]                           | 0.200x0.200x0.150                               | 0.220x0.200x0.040                                                               | 0.200x0.150x0.130                                              |
| GOOF on <i>F</i> <sup>2</sup>                             | 1.241                                           | 1.039                                                                           | 1.051                                                          |
| <i>R</i> ( <i>I</i> > 2 $\sigma$ ( <i>I</i> ))            | 0.0396                                          | 0.0342                                                                          | 0.0341                                                         |
| w <i>R</i> <sub>2</sub> (all data)                        | 0.0945                                          | 0.0922                                                                          | 0.0831                                                         |
| Largest difference peak<br>and hole, [e Å <sup>-3</sup> ] | 0.794 and -0.629                                | 0.399 and -0.308                                                                | 1.315 and -0.831                                               |
| CCDC number                                               | 2250100                                         | 2250101                                                                         | 2250102                                                        |

**Table S2.** Crystallographic data for the compounds **6-OTf** and **7**

| Compound                                                  | 6-OTf                                                                        | 7                                                                                            |
|-----------------------------------------------------------|------------------------------------------------------------------------------|----------------------------------------------------------------------------------------------|
| Chemical formula                                          | C <sub>28</sub> H <sub>23</sub> F <sub>3</sub> O <sub>5</sub> S <sub>3</sub> | C <sub>26</sub> H <sub>38</sub> F <sub>3</sub> N <sub>2</sub> O <sub>3</sub> PS <sub>2</sub> |
| <i>M<sub>r</sub></i>                                      | 592.64                                                                       | 578.67                                                                                       |
| Crystal system                                            | Triclinic                                                                    | Monoclinic                                                                                   |
| Space group                                               | <i>P</i> $\bar{1}$                                                           | <i>P</i> 2 <sub>1</sub> /n                                                                   |
| <i>a</i> [Å]                                              | 8.4599(5)                                                                    | 9.7299(11)                                                                                   |
| <i>b</i> [Å]                                              | 10.1945(8)                                                                   | 25.933(3)                                                                                    |
| <i>c</i> [Å]                                              | 15.6864(11)                                                                  | 11.4278(14)                                                                                  |
| $\alpha$ [°]                                              | 87.221(3)                                                                    | 90                                                                                           |
| $\beta$ [°]                                               | 80.592(3)                                                                    | 93.745(3)                                                                                    |
| $\gamma$ [°]                                              | 81.145(3)                                                                    | 90                                                                                           |
| <i>V</i> [Å <sup>3</sup> ]                                | 1318.38(16)                                                                  | 2877.4(6)                                                                                    |
| <i>Z</i>                                                  | 2                                                                            | 4                                                                                            |
| $\rho$ [g cm <sup>-3</sup> ]                              | 1.493                                                                        | 1.336                                                                                        |
| $\mu$ (MoK $\alpha$ ) [mm <sup>-1</sup> ]                 | 0.341                                                                        | 0.290                                                                                        |
| Reflections collected                                     | 47401                                                                        | 94369                                                                                        |
| Independent reflections                                   | 6600<br>R(int)=0.0673                                                        | 7249<br>R(int)=0.1047                                                                        |
| Data/<br>restraints/<br>parameters                        | 6600/0/353                                                                   | 7249/0/342                                                                                   |
| Crystal size [mm <sup>3</sup> ]                           | 0.200x0.120x0.050                                                            | 0.200x0.200x0.050                                                                            |
| GOOF on F <sup>2</sup>                                    | 1.051                                                                        | 1.031                                                                                        |
| R ( <i>I</i> > 2 $\sigma$ ( <i>I</i> ))                   | 0.0421                                                                       | 0.0400                                                                                       |
| wR2 (all data)                                            | 0.1028                                                                       | 0.0914                                                                                       |
| Largest difference peak<br>and hole, [e Å <sup>-3</sup> ] | 0.640 and -0.296                                                             | 0.327 and -0.350                                                                             |
| CCDC number                                               | 2250103                                                                      | 2250104                                                                                      |

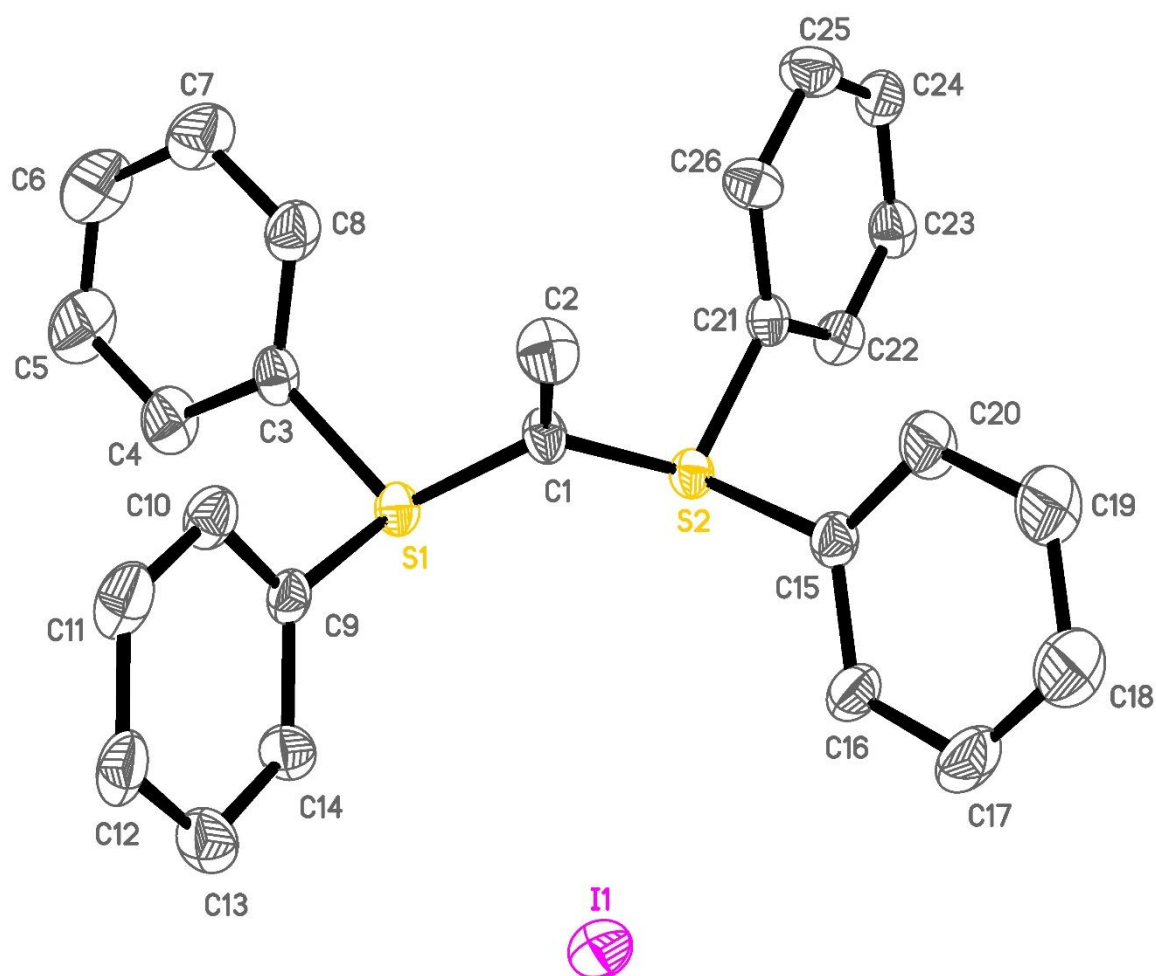

**Figure S10.** Molecular view of **3**. Thermal ellipsoids set at 30 % probability. H and disordered atoms are omitted for clarity. Selected bond lengths (Å) and angles (°): S1-C1 1.682(9), C1-S2 1.687(9), C1-C2 1.525(12), S1-C3 1.794(4), S1-C9 1.759(3), S2-C21 1.772(4), S2-C15 1.776(3). S1-C1-S2 111.6(6), S2-C1-C2 123.8(6), C2-C1-S1 124.3(6), C9-S1-C1 107.4(3), C1-S1-C3 111.6(4), C3-S1-C9 100.2(2), C1-S2-C15 107.6(3), C15-S2-C21 101.5(2), C21-S2-C1 111.9(4).

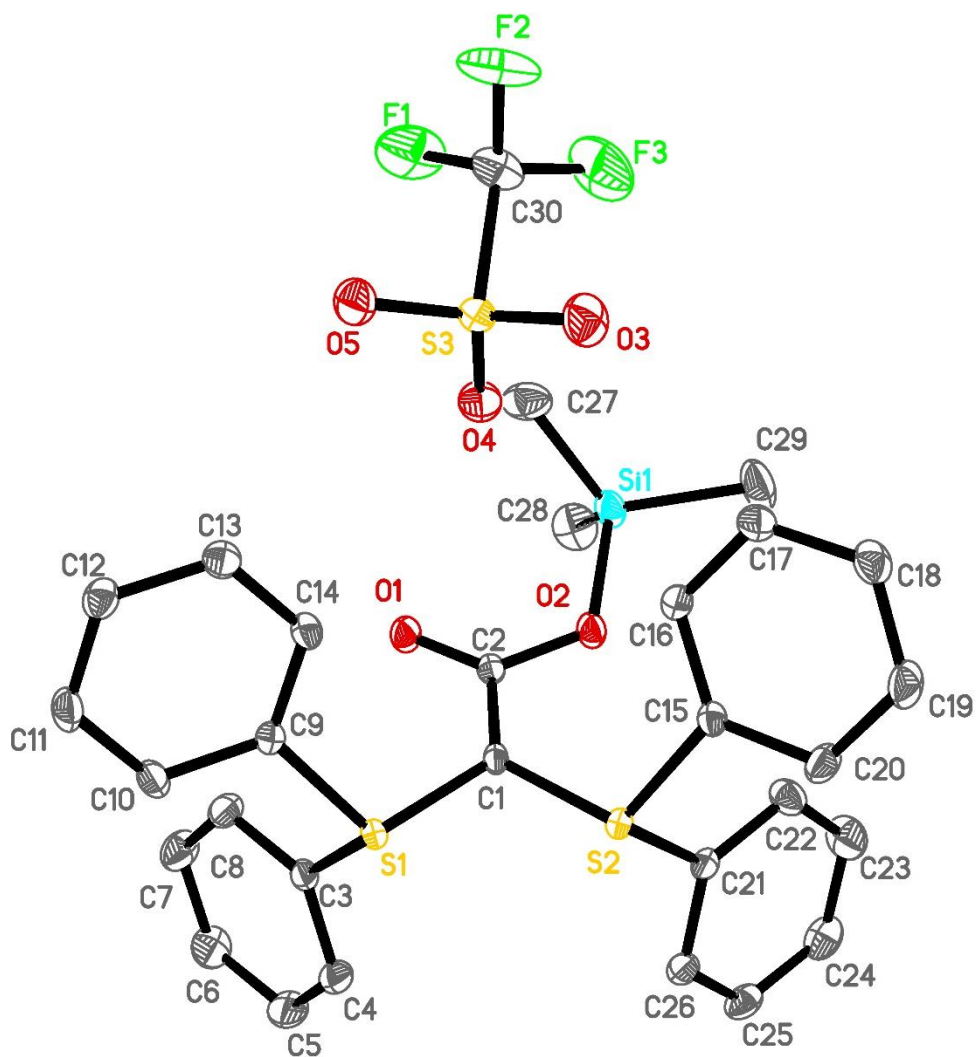

**Figure S11.** Molecular view of **5**. Thermal ellipsoids set at 30 % probability. H atoms are omitted for clarity. Selected bond lengths (Å) and angles (°): S1-C1 1.717(2), C1-S2 1.717(1), C1-C2 1.449(2), C2-O1 1.218(2), C2-O2 1.344(2), O2-Si1 1.705(1), Si1-C27 1.846(2), Si1-C28 1.847(2), Si1-C29 1.846(2), S1-C3 1.790(2), S1-C9 1.792(2), S2-C21 1.790(2), S2-C15 1.790(1). S1-C1-S2 110.62(8), S2-C1-C2 126.62(10), C2-C1-S1 122.00(10), C1-C2-O1 123.83(13), O1-C2-O2 123.36(13), O2-C2-C1 112.81(11).



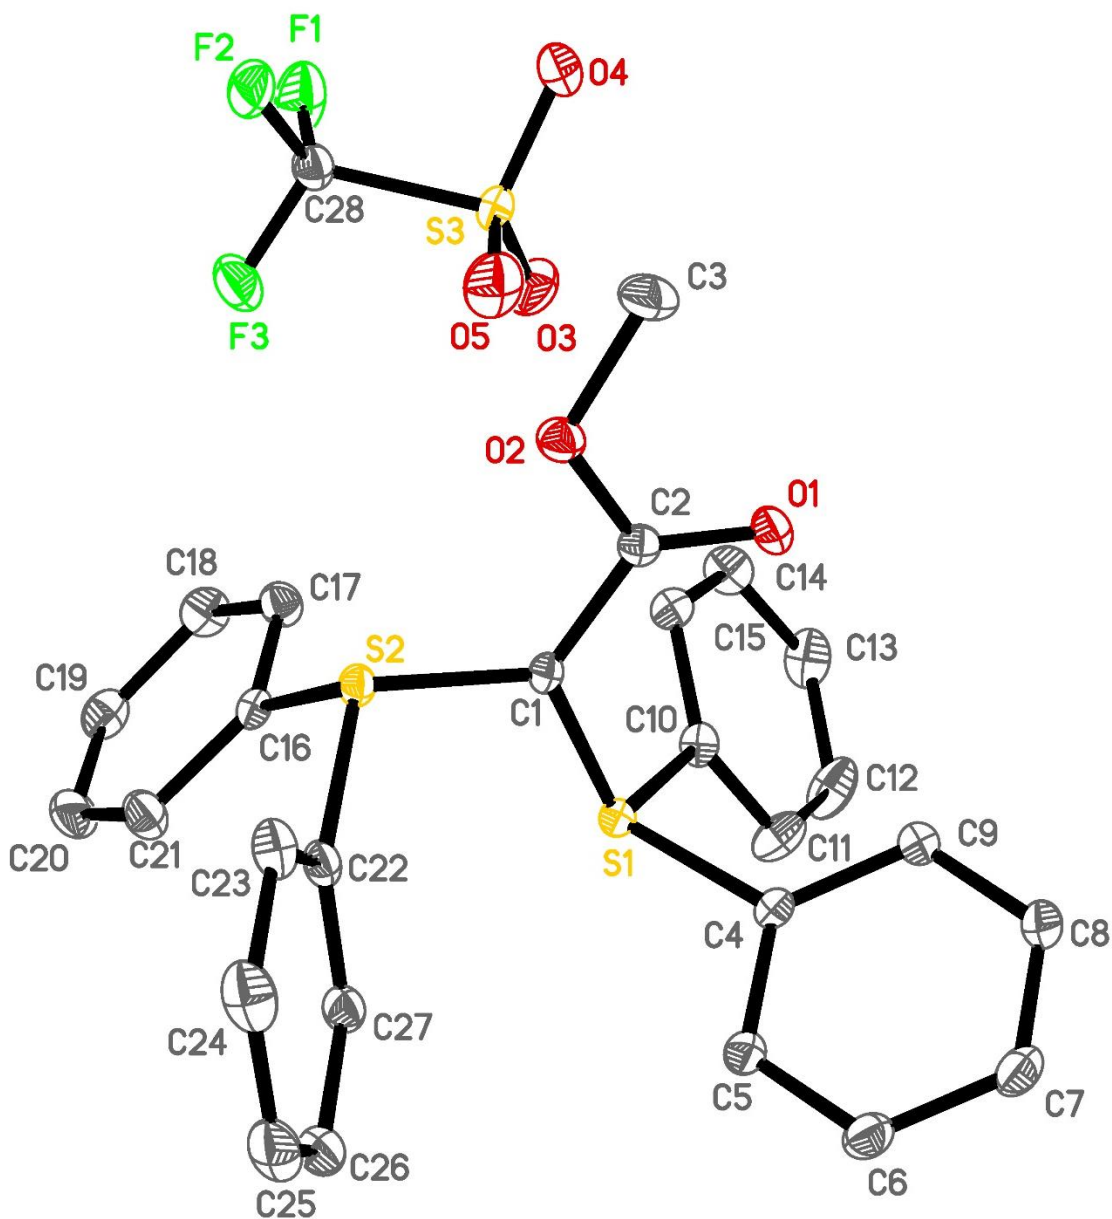

**Figure S13.** Molecular view of **6-OTf**. Thermal ellipsoids set at 30 % probability. H atoms are omitted for clarity. Selected bond lengths (Å) and angles (°): S1-C1 1.708(2), C1-S2 1.719(2), C1-C2 1.438(3), C2-O1 1.213(2), C2-O2 1.351(2), O2-C3 1.439(3), S1-C4 1.792(2), S1-C10 1.795(2), S2-C22 1.785(2), S2-C16 1.793(2). S1-C1-S2 118.17(11), S1-C1-C2 122.30(14), C2-C1-S2 119.27(14), C1-C2-O2 112.64(16), O2-C2-O1 123.38(18), O1-C2-C1 123.97(18).

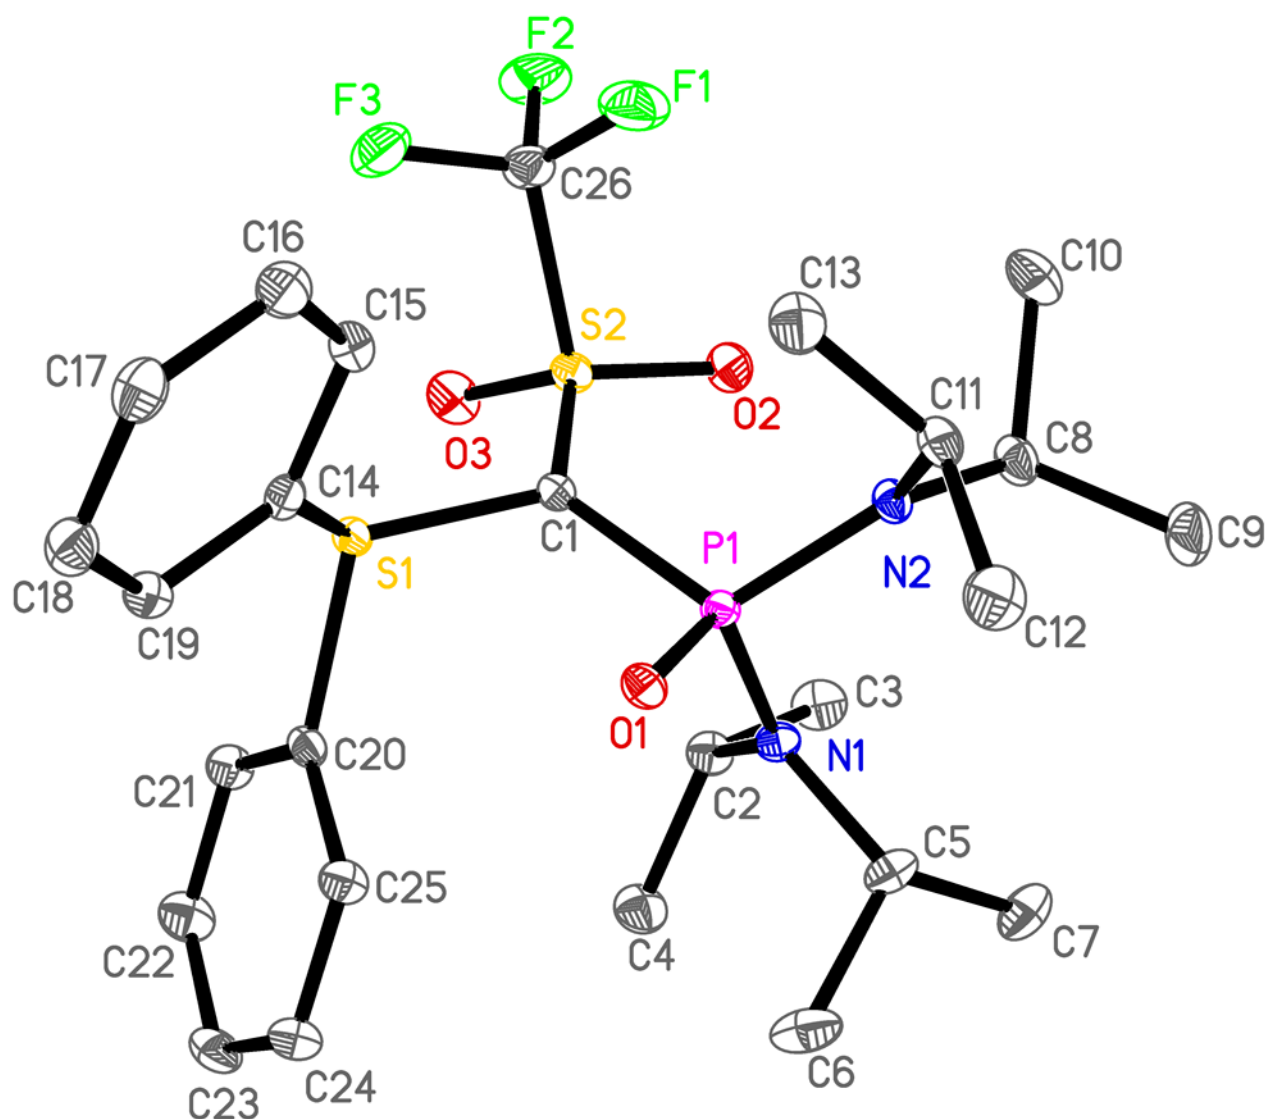

**Figure S14.** Molecular view of **7**. Thermal ellipsoids set at 30 % probability. H atoms are omitted for clarity. Selected bond lengths (Å) and angles (°): S1-C1 1.724(2), C1-S2 1.694(2), C1-P1 1.807(2), S1-C14 1.803(2), S1-C20 1.788(2), P1-O1 1.487(1), P1-N1 1.669(2), P1-N2 1.656(2), S2-O2 1.434(2), S2-O3 1.437(1), S2-C26 1.841(2), C26-F1 1.327(2), C26-F2 1.336(2), C26-F3 1.333(2). S1-C1-P1 120.80(10), S1-C1-S2 109.97(10), P1-C1-S2 127.57(11).

S1 SADABS, Program for data correction, Bruker-AXS.

S2 Sheldrick, G. M.; *SHELXT*; Integrated space-group and crystal-structure determination. *Acta Crystallogr. Sect. A*, **2015**, *71*, 3-8.

S3 Sheldrick; G. M.; Crystal structure refinement with *SHELXL*. *Acta Crystallogr. Sect. C*, **2015**, *71*, 3-8.
